# Supplementary material
Source: PubMed Central journal article supplement (PMC4429726)
Supplement: mt2014103x1.pdf [file mt2014103x1.pdf]

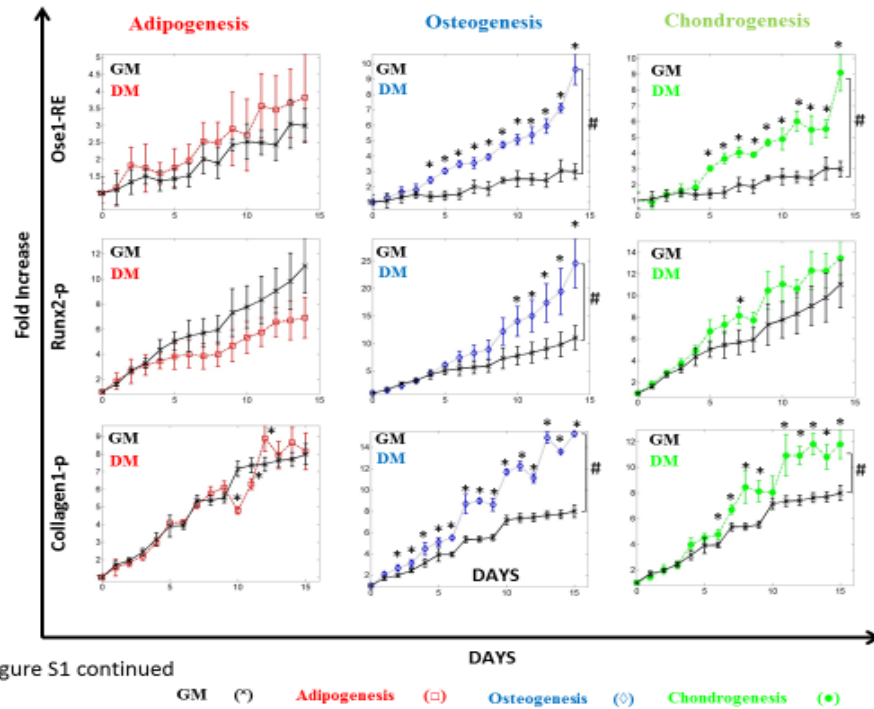

**Figure S1:** Dynamics of P/RE activity during adipogenic (red lines), osteogenic condition (blue lines), or chondrogenic (green lines) differentiation. Control cells were cultured in GM (black lines). Normalized fluorescence intensity was plotted as fold-increase over day 0, when differentiation was induced. All values represent the mean $\pm$ SD of triplicate samples in a representative experiment (n=3). \* denotes  $p < 0.05$  between DM and GM using individual as calculated by t-test; and # denotes  $p < 0.05$  between DM and GM as calculated by the AUC method.
