# Supplementary material
Source: PubMed Central journal article supplement (PMC4429726)
Supplement: mt2014103x2.pdf [file mt2014103x2.pdf]

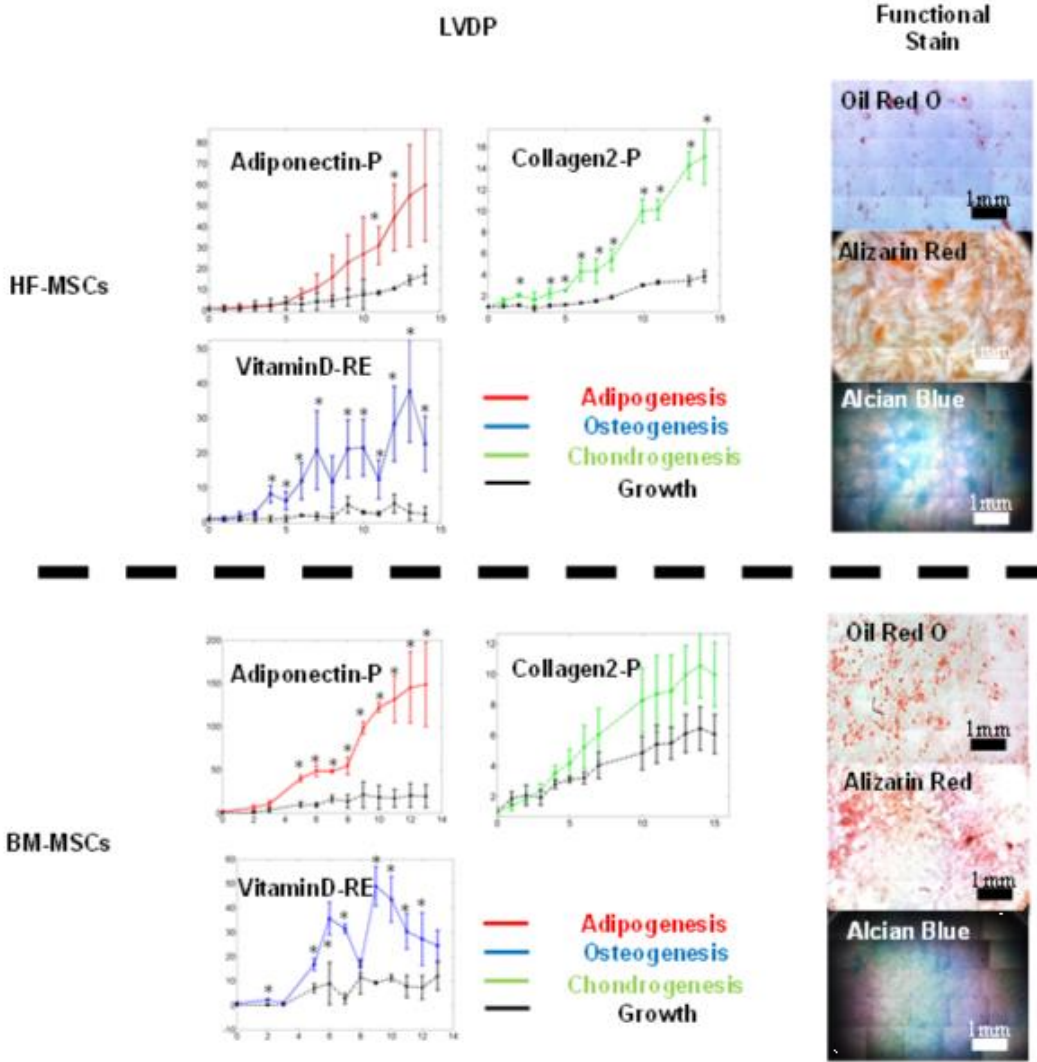

**Figure S2:** P/RE reporters capture the differentiation potentials of HF-MSCs and BM-MSC as shown by functional differentiation staining.
