# Supplementary material
Source: PubMed Central journal article supplement (PMC4429726)
Supplement: mt2014103x4.pdf [file mt2014103x4.pdf]

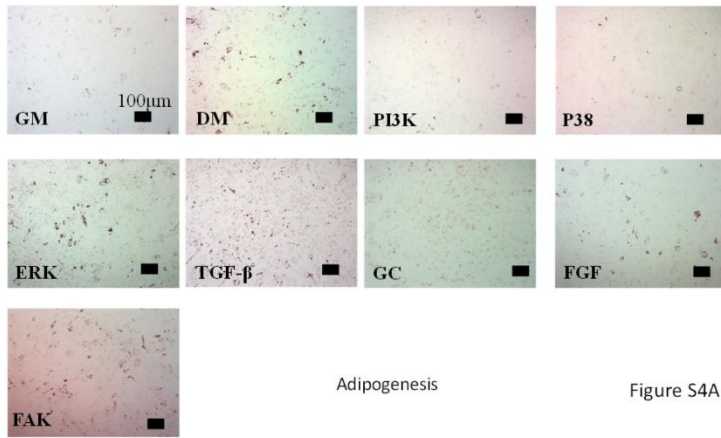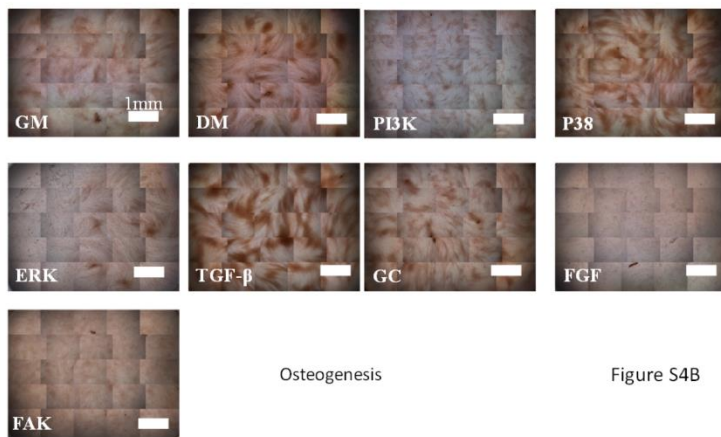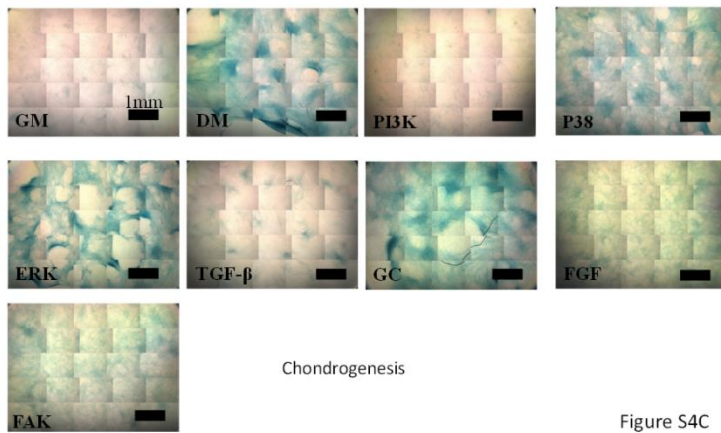

**Figure S4:** Representative staining images of MSC that were induced to differentiate in the absence (DM) or presence of the indicated pathway inhibitor. As control, MSC were cultured in GM. At the end of the differentiation period MSC were stained for (a) Oil Red; (b) Alizarin Red; (c) Alcian Blue. The scale bar in a is 100µm; and in b and c is 1mm.
