# Supplementary material
Source: PubMed Central journal article supplement (PMC4429726)
Supplement: mt2014103x5.pdf [file mt2014103x5.pdf]

**Table S1:** Summary of the time, fold increase/decrease and standard deviation (SD) when the normalized fluorescence intensity between the indicated DM and GM was maximum (n=3).

| Reporters     | Adipogenesis |       |      | Osteogenesis |       |      | Chondrogenesis |       |      |
|---------------|--------------|-------|------|--------------|-------|------|----------------|-------|------|
|               | Time (day)   | Fold  | ±SD  | Time (day)   | Fold  | ±SD  | Time (day)     | Fold  | ±SD  |
| GATA-RE       | 14           | -2.10 | 0.86 | 1            | 1.85  | 0.92 | 10             | 1.88  | 0.24 |
| GATA2-RE      | 13           | -1.51 | 0.14 | 3            | 1.15  | 0.15 | 12             | 2.32  | 0.18 |
| GATA3-RE      | 12           | -2.88 | 0.28 | 14           | 1.89  | 0.59 | 13             | 3.07  | 0.37 |
| P53-RE        | 6            | -7.81 | 1.34 | 6            | 2.62  | 0.41 | 2              | -1.44 | 0.37 |
| C/EBP-RE      | 1            | 1.72  | 0.35 | 10           | 3.50  | 0.44 | 12             | 1.71  | 0.21 |
| SMAD2/3-RE    | 13           | -2.16 | 0.27 | 1            | -1.78 | 1.71 | 7              | 5.89  | 0.50 |
| KLF4-RE       | 5            | 1.68  | 0.11 | 14           | 2.10  | 0.05 | 12             | 2.73  | 0.70 |
| SMAD1/5/8-RE  | 14           | -1.34 | 0.18 | 12           | 1.97  | 0.10 | 6              | 1.49  | 0.10 |
| SMAD7-RE      | 10           | -2.35 | 0.54 | 13           | 2.71  | 0.73 | 13             | 4.92  | 1.00 |
| Adiponectin-P | 9            | 9.62  | 2.81 | 1            | 1.99  | 2.12 | 3              | -2.11 | 1.72 |
| SOX9-P        | 13           | -1.46 | 0.52 | 11           | 2.00  | 0.57 | 12             | 2.86  | 0.38 |
| KLF5-P        | 9            | -1.44 | 0.12 | 14           | 1.72  | 0.16 | 7              | 2.1   | 0.25 |
| MyoD-RE       | 11           | -1.64 | 0.39 | 14           | 1.85  | 0.40 | 7              | 1.67  | 0.07 |
| VitD-RE       | 6            | -3.26 | 5.15 | 7            | 11.84 | 6.46 | 10             | 3.14  | 4.31 |
| OC-BOX-RE     | 5            | 6.189 | 4.37 | 6            | 6.61  | 4.02 | 6              | 2.97  | 4.01 |
| Ose1-RE       | 11           | 1.43  | 0.38 | 14           | 3.22  | 0.33 | 14             | 3.04  | 0.39 |
| Runx2-P       | 14           | -1.60 | 0.39 | 14           | 2.23  | 0.41 | 7              | 1.43  | 0.14 |
| Collagen1-P   | 10           | -1.49 | 0.06 | 13           | 1.95  | 0.07 | 8              | 1.58  | 0.23 |
| Collagen2-P   | 10           | -2.72 | 0.57 | 3            | 1.56  | 0.31 | 10             | 3.31  | 0.37 |
| ERK-RE        | 13           | 1.11  | 1.37 | 9            | 2.3   | 0.25 | 14             | 2.06  | 0.2  |
