# Supplementary material
Source: PubMed Central journal article supplement (PMC4429726)
Supplement: mt2014103x7.pdf [file mt2014103x7.pdf]

**Table S3** Summary of the time, fold increase/decrease and standard deviation (SD) when the normalized fluorescence intensity between the indicated DM and DM+I was maximum (n=3).

| <b>Lineage ►</b>    | <b>Adipogenesis</b>  |       |      | <b>Osteogenesis</b> |         |        | <b>Chondrogenesis</b> |       |      |
|---------------------|----------------------|-------|------|---------------------|---------|--------|-----------------------|-------|------|
| <b>Construct ►</b>  | <b>Adiponectin-P</b> |       |      | <b>VitD-RE</b>      |         |        | <b>Collagen2-P</b>    |       |      |
| <b>Inhibitors ▼</b> | Time (day)           | Fold  | ±SD  | Time (day)          | Fold    | ±SD    | Time (day)            | Fold  | ±SD  |
| PI3Kinase           | 10                   | -6.96 | 0.98 | 10                  | -19.57  | 14.88  | 7                     | -3.65 | 1.67 |
| P38                 | 10                   | -4.05 | 1.36 | 3                   | 4.84    | 1.26   | 10                    | -3.57 | 1.08 |
| ERK                 | 10                   | 1.69  | 0.5  | 6                   | 18.25   | 18.66  | 7                     | 1.29  | 0.11 |
| TGF-β               | 5                    | 2.07  | 0.23 | 8                   | -2.18   | 1.03   | 7                     | -2.59 | 0.70 |
| GC                  | 10                   | -7.93 | 2.53 | 8                   | -4.50   | 2.69   | 5                     | -2.24 | 1.11 |
| FGF                 | 3                    | -5.34 | 2.26 | 8                   | -82.28  | 59.76  | 7                     | -5.89 | 0.14 |
| FAK                 | 10                   | 2.6   | 2.4  | 5                   | -160.95 | 124.07 | 8                     | -1.84 | 0.17 |
